# Supplementary material for: Prenatal Methyl-Donor Supplementation Augments Colitis in Young Adult Mice
Source: PubMed Central journal article supplement (PMC3747105; doi:10.1371/journal.pone.0073162), 2013-08-19
Supplement: pone.0073162.s003.pdf [file pone.0073162.s003.pdf]

**Table S1. The effects of prenatal control diets on colonic mucosa and feces associated bacterial taxa.**

|                                          | <b>Mucosa</b> | <b>Feces</b> |                      |
|------------------------------------------|---------------|--------------|----------------------|
| <b>Phyla</b>                             | <b>%</b>      | <b>%</b>     | <b>Paired T test</b> |
| Tenericutes                              | 43.87         | 1.51         | 0.0000001            |
| Bacteroidetes                            | 10.40         | 55.38        | 0.0002               |
| Verrucomicrobia                          | 0.01          | 0.27         | 0.0458               |
| <b>Genera</b>                            | <b>%</b>      | <b>%</b>     | <b>Paired T test</b> |
| <i>Allobaculum</i>                       | 35.16         | 1.04         | 0.001                |
| <i>Mogibacterium</i>                     | 0.02          | 0.08         | 0.004                |
| <i>Parabacteroides</i>                   | 8.81          | 41.29        | 0.0043               |
| <i>Rfn20</i>                             | 0.01          | 0.03         | 0.0096               |
| <i>Prevotella</i>                        | 1.29          | 11.52        | 0.0124               |
| <i>Turicibacter</i>                      | 3.44          | 0.45         | 0.0204               |
| <i>Brevibacillus</i>                     | 13.93         | 0.54         | 0.0242               |
| <i>Sphingobium</i>                       | 0.05          | 0            | 0.0288               |
| <i>Dehalobacterium</i>                   | 0.04          | 0.81         | 0.0299               |
| <i>Lactobacillus</i>                     | 5.46          | 0.48         | 0.0327               |
| <i>Blautia</i>                           | 4.29          | 13.69        | 0.0336               |
| <i>Shimazuella</i>                       | 0.04          | 0.00         | 0.0466               |
| <b>Species</b>                           | <b>%</b>      | <b>%</b>     | <b>Paired T test</b> |
| <i>Mogibacterium (species unknown)</i>   | 0.02          | 0.08         | 0.004                |
| <i>Parabacteroides distasonis</i>        | 8.81          | 41.29        | 0.0043               |
| <i>Clostridium sordellii</i>             | 0.27          | 0.02         | 0.0063               |
| <i>Rfn20 (species unknown)</i>           | 0.01          | 0.03         | 0.0096               |
| <i>Prevotella falsenii</i>               | 0.28          | 2.33         | 0.017                |
| <i>Prevotella copri</i>                  | 0.26          | 1.90         | 0.0184               |
| <i>Turicibacter (species unknown)</i>    | 3.44          | 0.45         | 0.0204               |
| <i>Lactobacillus reuteri</i>             | 0.30          | 0            | 0.0214               |
| <i>Clostridium celerecrescens</i>        | 0.24          | 1.20         | 0.0227               |
| <i>Roseburia eubacterium rectale</i>     | 0.13          | 0.53         | 0.023                |
| <i>Ruminococcus flavefaciens</i>         | 0.08          | 0.29         | 0.0235               |
| <i>Brevibacillus laterosporus</i>        | 13.93         | 0.54         | 0.0242               |
| <i>Allobaculum stercoricanis</i>         | 19.27         | 0.99         | 0.0275               |
| <i>Sphingobium yanoikuyae</i>            | 0.05          | 0.00         | 0.0288               |
| <i>Dehalobacterium (species unknown)</i> | 0.04          | 0.81         | 0.0299               |
| <i>Blautia producta</i>                  | 4.27          | 13.56        | 0.0364               |
| <i>Lactobacillus iners</i>               | 5.13          | 0.43         | 0.0404               |
| <i>Prevotella baroniae</i>               | 0.05          | 0.30         | 0.0435               |
| <i>Shimazuella (species unknown)</i>     | 0.04          | 0            | 0.0466               |
| <i>Lactobacillus intestinalis</i>        | 0.03          | 0            | 0.0476               |

Significant bacterial abundance differences at the phyla, genera, and species level between the mucosal and fecal samples of the C-C group (C: control diet *in utero* and lactation). Paired T test comparisons between the two groups (see Materials and Methods). The most prominently

differing phyla between mucosal and feces was Tenericutes. A total of 12 genera and 20 species were significantly different in the mucosa as compared to the luminal content in the control group.
