# Supplementary material for: Prenatal Methyl-Donor Supplementation Augments Colitis in Young Adult Mice
Source: PubMed Central journal article supplement (PMC3747105; doi:10.1371/journal.pone.0073162), 2013-08-19
Supplement: pone.0073162.s004.pdf [file pone.0073162.s004.pdf]

**Table S2. The effects of prenatal MD supplemented diet on colonic mucosa and feces associated bacterial taxa.**

| <b>MD-C Mucosa-Feces</b>             | <b>Mucosa</b> | <b>Feces</b> |                      |
|--------------------------------------|---------------|--------------|----------------------|
| <b>Phyla</b>                         | <b>%</b>      | <b>%</b>     | <b>Paired T test</b> |
| Bacteroidetes                        | 8.80          | 33.91        | 0.000012             |
| Tenericutes                          | 29.84         | 1.17         | 0.0026               |
| Cyanobacteria                        | 0.02          | 0            | 0.0216               |
| <b>Genera</b>                        | <b>%</b>      | <b>%</b>     | <b>Paired T test</b> |
| <i>Pseudobutyrvibrio</i>             | 0.07          | 0.12         | 0.0001               |
| <i>Parabacteroides</i>               | 7.88          | 27.97        | 0.0039               |
| <i>Butyrvibrio</i>                   | 0.15          | 0.49         | 0.0041               |
| <i>Psb</i>                           | 0.07          | 0.22         | 0.0112               |
| <i>Lachnospira</i>                   | 0.01          | 0.18         | 0.0126               |
| <i>Brevibacillus</i>                 | 13.64         | 0.29         | 0.0179               |
| <i>Allobaculum</i>                   | 17.78         | 0.34         | 0.018                |
| <i>Caloramator</i>                   | 0.03          | 0.15         | 0.0192               |
| <i>Granulicatella</i>                | 9.80          | 0.15         | 0.0202               |
| <i>Anaerostipes</i>                  | 1.48          | 3.25         | 0.0218               |
| <i>P</i>                             | 1.57          | 0.06         | 0.0222               |
| <i>Prevotella</i>                    | 0.78          | 5.52         | 0.0223               |
| <i>Blautia</i>                       | 3.92          | 21.61        | 0.0225               |
| <i>Dorea</i>                         | 0.06          | 0.01         | 0.0231               |
| <i>Enterococcus</i>                  | 0.07          | 0            | 0.0252               |
| <i>Pontibacter</i>                   | 0.06          | 0.19         | 0.0269               |
| <i>Alkaliphilus</i>                  | 0.03          | 0.28         | 0.0287               |
| <i>Tannerella</i>                    | 0.03          | 0.19         | 0.0293               |
| <i>Roseburia</i>                     | 2.02          | 4.43         | 0.0318               |
| <i>Clostridium</i>                   | 13.92         | 6.01         | 0.0329               |
| <i>Oscillospira</i>                  | 1.24          | 3.95         | 0.0342               |
| <i>Shimazuella</i>                   | 0.03          | 0.01         | 0.0457               |
| <b>Species</b>                       | <b>%</b>      | <b>%</b>     | <b>Paired T test</b> |
| <i>Pseudobutyrvibrio ruminis</i>     | 0.07          | 0.12         | 0.0001               |
| <i>Parabacteroides distasonis</i>    | 7.88          | 27.97        | 0.0039               |
| <i>Clostridium orbiscindens</i>      | 0.26          | 0.72         | 0.0046               |
| <i>Butyrvibrio hungatei</i>          | 0.05          | 0.35         | 0.0061               |
| <i>Clostridium methylpentosum</i>    | 0.06          | 0.22         | 0.01                 |
| <i>Psb</i>                           | 0.07          | 0.22         | 0.0112               |
| <i>Blautia ruminococcus obeum</i>    | 0.13          | 0.32         | 0.0122               |
| <i>Lachnospira pectinoschiza</i>     | 0.01          | 0.18         | 0.0126               |
| <i>Brevibacillus laterosporus</i>    | 13.64         | 0.29         | 0.0179               |
| <i>Allobaculum stercoricanis</i>     | 17.70         | 0.33         | 0.018                |
| <i>Clostridium cocleatum</i>         | 10.37         | 0.40         | 0.0188               |
| <i>Caloramator (species unknown)</i> | 0.03          | 0.15         | 0.0192               |
| <i>Granulicatella adiacens</i>       | 9.75          | 0.15         | 0.0202               |
| <i>Clostridium perfringens</i>       | 0.28          | 0.01         | 0.0208               |
| <i>Anaerostipes caccae</i>           | 1.48          | 3.25         | 0.0218               |
| <i>P</i>                             | 1.57          | 0.06         | 0.0222               |

| <b>Species continued</b>             | <b>%</b> | <b>%</b> | <b>Paired T test</b> |
|--------------------------------------|----------|----------|----------------------|
| <i>Dorea formicigenerans</i>         | 0.06     | 0.01     | 0.0231               |
| <i>Blautia producta</i>              | 3.79     | 21.28    | 0.0238               |
| <i>Clostridium celerecrescens</i>    | 0.43     | 1.06     | 0.0251               |
| <i>Enterococcus faecalis</i>         | 0.07     | 0        | 0.0252               |
| <i>Prevotella copri</i>              | 0.20     | 1.03     | 0.0264               |
| <i>Prevotella multiformis</i>        | 0.11     | 0.30     | 0.0264               |
| <i>Pontibacter korlensis</i>         | 0.06     | 0.19     | 0.0269               |
| <i>Granulicatella elegans</i>        | 0.04     | 0.00     | 0.0275               |
| <i>Tannerella forsythia</i>          | 0.03     | 0.19     | 0.0293               |
| <i>Alkaliphilus transvaalensis</i>   | 0.02     | 0.28     | 0.0302               |
| <i>Prevotella falsenii</i>           | 0.26     | 1.86     | 0.0307               |
| <i>Oscillospira guilliermondii</i>   | 1.24     | 3.95     | 0.0342               |
| <i>Roseburia eubacterium rectale</i> | 0.60     | 1.41     | 0.0351               |
| <i>Allobaculum sp id4</i>            | 0.08     | 0.02     | 0.0386               |
| <i>Roseburia faecis</i>              | 1.43     | 3.02     | 0.0387               |
| <i>Shimazuella (species unknown)</i> | 0.03     | 0.01     | 0.0457               |
| <i>Prevotella intermedia</i>         | 0.11     | 1.12     | 0.0486               |

Significant bacterial abundance differences at the phyla, genera, and species level between the mucosal and fecal samples of the MD-C Group (MD-C: MD *in utero* and control diet in lactation). Paired T test comparisons between the two groups (see Materials and Methods). A total of 22 genera and 33 species were significantly different between mucosa and feces in the prenatally MD supplemented group.
